# Supplementary material
Source: PubMed Central journal article supplement (PMC6773609)

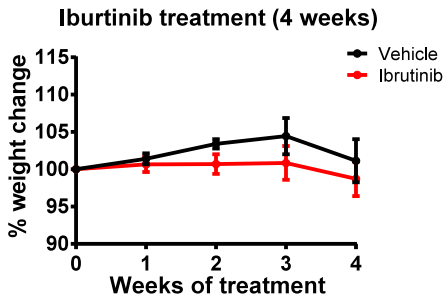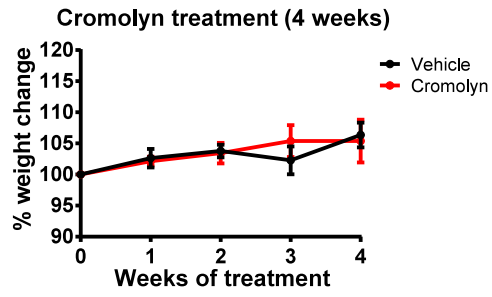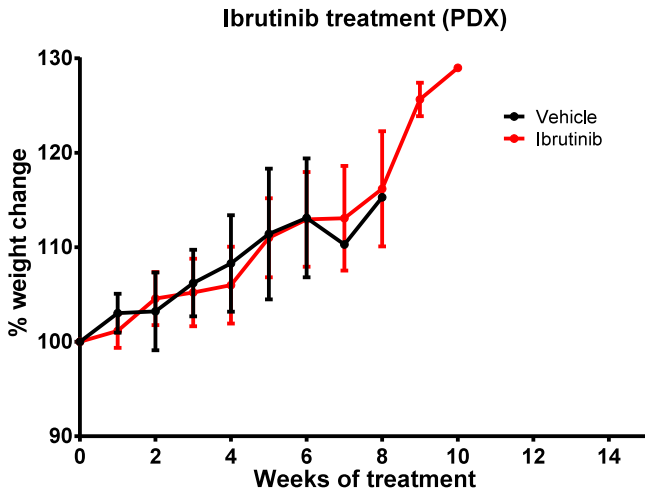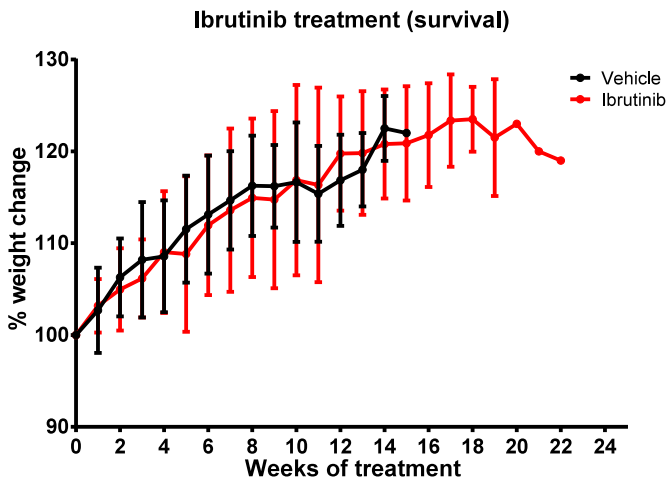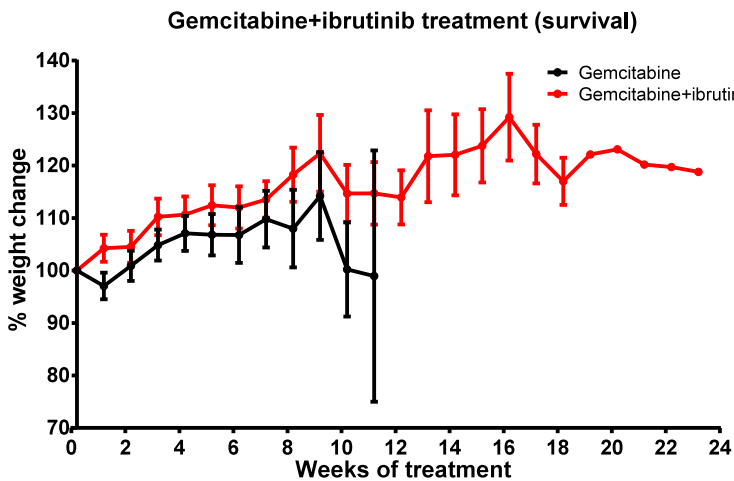

Supplement: EMS84468-supplement-Supplementary_Figure_1.pdf [file EMS84468-supplement-Supplementary_Figure_1.pdf]

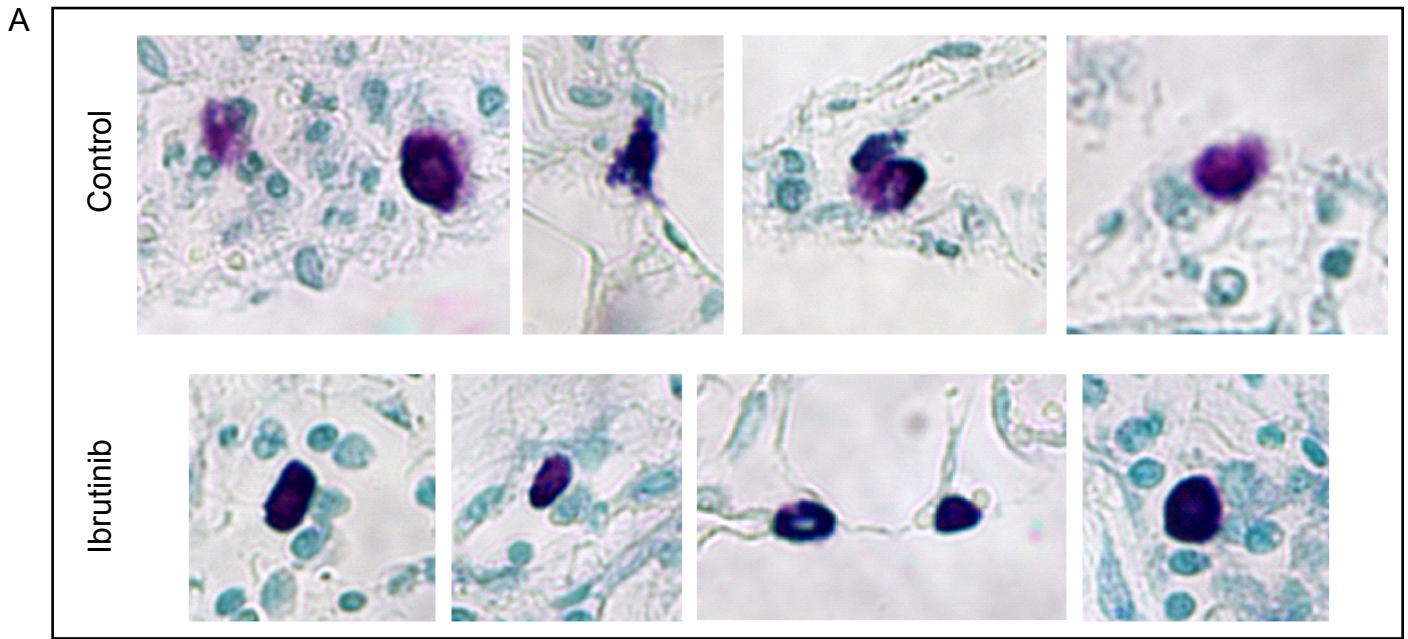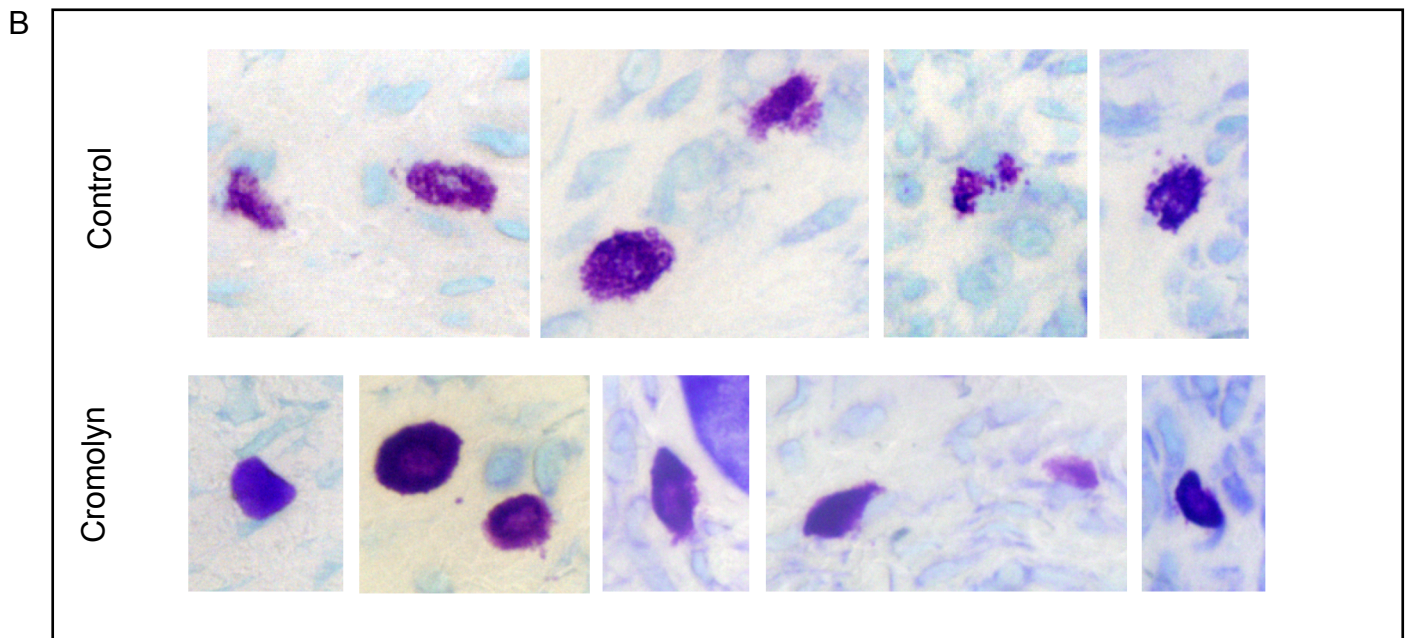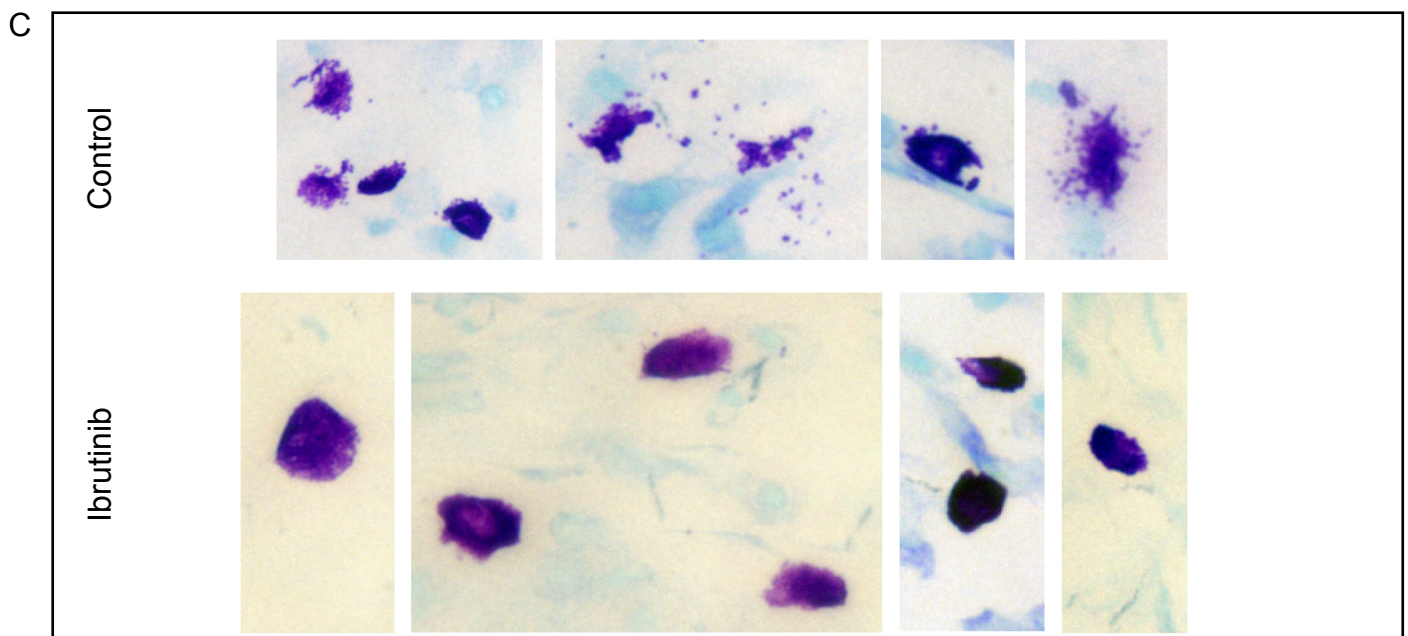

Supplement: EMS84468-supplement-Supplementary_Figure_2.pdf [file EMS84468-supplement-Supplementary_Figure_2.pdf]

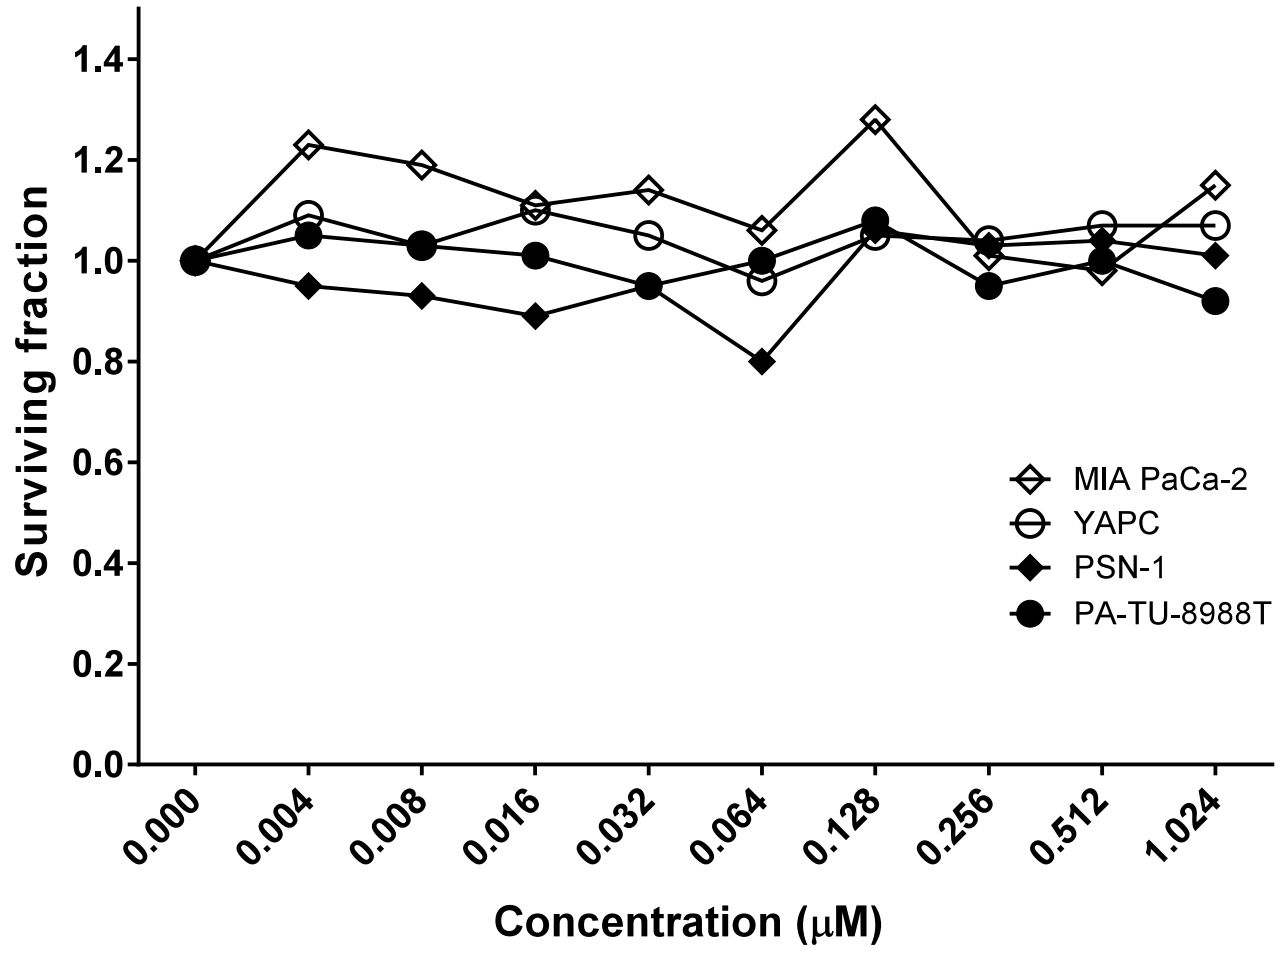

Supplement: EMS84468-supplement-Supplementary_Figure_3.pdf [file EMS84468-supplement-Supplementary_Figure_3.pdf]
